# Supplementary material
Source: Springer Nature journal article supplement (https://www.springermedizin.de/resource/supplementary/13054_2010_8787_MOESM3_ESM.pdf/9732574)

Modification of empiric treatment

n=74 (24)

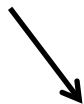

**37**

(10)

**10**

(3)

**8**

(2)

**19**

(9)

**30**

(6)

**14**

(6)

**3**

(1)

PCR+  
n=73 (24)

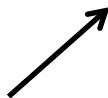

BC+  
n=44 (18)

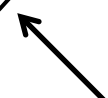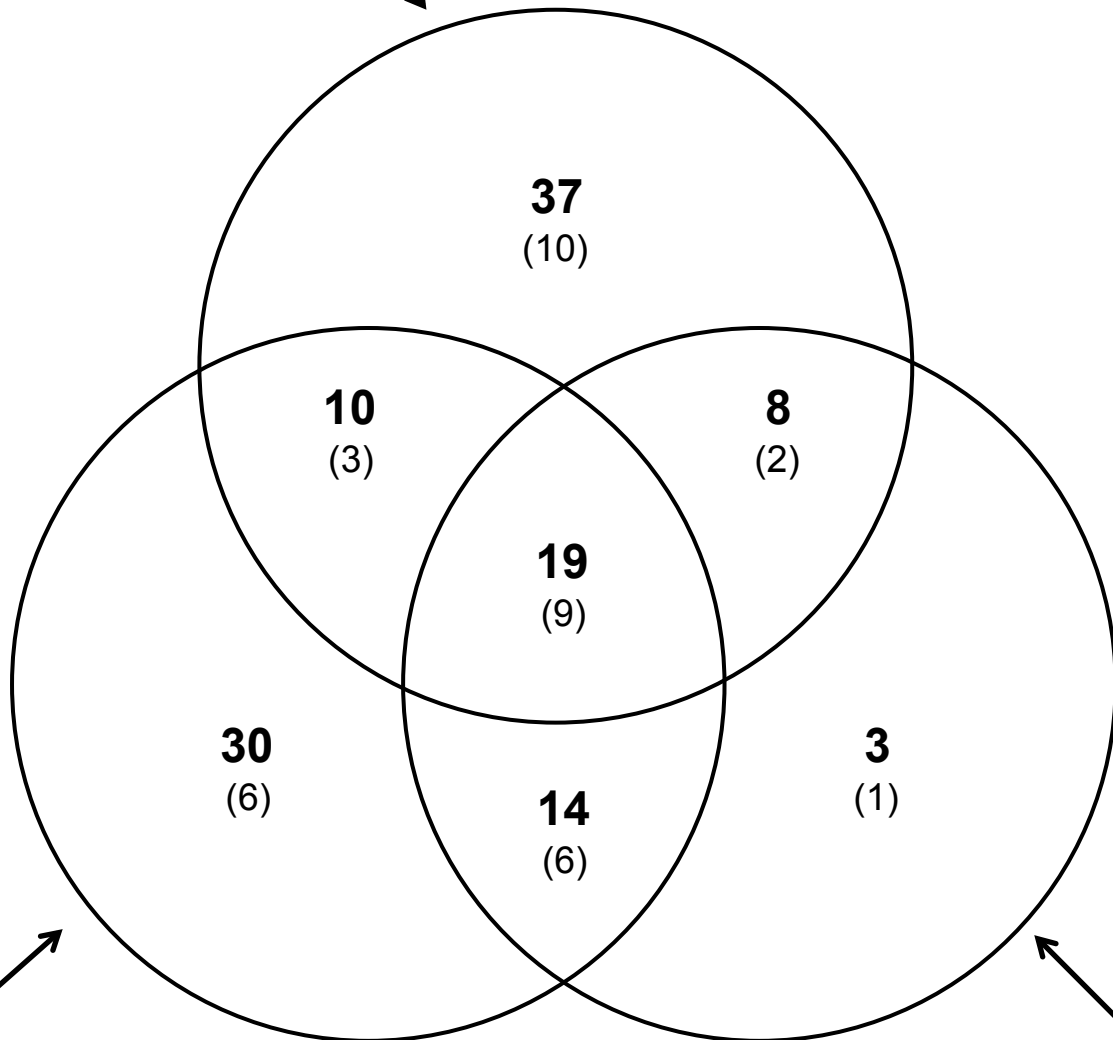

Supplement: MOESM3 [file 9732574]
